# Supplementary material for: Determination of Selected Polycyclic Aromatic Compounds in Particulate Matter Samples with Low Mass Loading: An Approach to Test Method Accuracy
Source: Hindawi journal article supplement (doi:10.1155/2017/3517457), 2017-01-01
Supplement: f1 [file 3517457.f1.docx]

**ESM – ELECTRONIC SUPPLEMENTARY MATERIAL**

**Figure 1s**: Flow diagram of experiments to evaluate accuracy: Comparison of results among agitation (AG-D and AG-DM using dichloromethane and dichloromethane/methanol, respectively), microwave (MAE) and Pressurized liquid (PLE) extractions. Sampling date and mass loadings of collected particulate matter (mg) are included in parentheses.

**Figure 2s** – Flow diagram of experiments to evaluate intermediate precision: Comparison of results of agitation (AG) with microwave (MAE) and Pressurized liquid (PLE) extractions.

**Table 1s** – Operational conditions of HPLC with fluorescence detector.

The abbreviations are expanded in the section “Reagents and standards”.

| **Chromatographic analysis by HPLC/FD** | | |  | |
| --- | --- | --- | --- | --- |
| Mobile phase gradient: AcN/H2O (% in volume) | | |  | |
|  | PAHs | NPAHs | |
|  | 0 min - 45/55 | 0 min - 50/50 | |
|  | 2 min – 45/55 | 12 min – 100 | |
|  | 28 min – 100/0 | 15 min – 100 | |
|  | 31 min – 100/0 | 20 min – 50/50 | |
|  | 33 min – 45/55 |  | |
|  | 37 min – 45/55 |  | |
| *Fluorescence detection (λexc/λem)* | |  | |
|  | 0 min – 280/320 (Na, Ace,F) | Analysis 1 | |
|  | 13.10 min – 250/360 (Ph) | 0’- 243/429 (2NNa, 3NPh, 9NPh, 1NPyr) | |
|  | 14.15 min – 250/370 (An) |  | |
|  | 15.45 min – 240/460 (Fl) | Analysis 2 | |
|  | 16.65 min – 250/370 (Pyr) | 0’ – 244/528 (3NFl) | |
|  | 19.10 min – 270/390 (BaA, Cry) |  | |
|  | 21.80 min – 300/430 (BbF, BkF, BaP, DBA, BghiP) |  | |

*AcN* acetonitrile, *H2O* water. *λexc/λem* the wavelengths of excitation/emission light during fluorescence analysis.

**Table 2s** – Results obtained from the analyses of the reference material, SRM 1649b, using agitation/sonication procedure and dichloromethane as extraction solvent. Results are expressed in µg g-1 and ng g-1 for PAHs and NPyr, respectively.

The abbreviations are expanded in the section “Reagents and standards”.

|  | Certified | Measured | R% |
| --- | --- | --- | --- |
| Phe | 3.94±0.047 | 3.04±0.095 | 77 |
| Fl | 6.1±0.12 | 5.0±0.15 | 82 |
| Pyr | 4.78±0.029 | 4.1±0.21 | 86 |
| BaA | 2.09±0.048 | 1.9±0.10 | 91 |
| Cry | 3.01±0.044 | 2.7±0.26 | 90 |
| BbF | 6.0±0.20 | 5. 6±0.32 | 93 |
| BkF | 1.75±0.083 | 1.49±0.085 | 85 |
| BaP | 2.5±0.17 | 1.65±0.12 | 66 |
| DBA | 0.29±0.004 | 0.19±0.051 | 66 |
| BghiP | 3.94±0.052 | 3.2±0.15 | 81 |
| 1NPyr | 71.8±1.3 | 58±16 | 81 |

**Table 3s** –Calculations of intermediate precision as Percentage difference by estimating a relative standard deviations of the normalized differences: The normalized difference data was calculated as the difference divided by mean value for each pair of data

The abbreviations are expanded in the section “Reagents and standards”.
